1 Isolation-by-distance and population-size history inferences from  
2 the coho salmon (*Oncorhynchus kisutch*) genome

3

4 Eric B. Rondeau<sup>1,2,3\*</sup>, Kris A. Christensen<sup>1,2\*</sup>, David R. Minkley<sup>1,2</sup>, Jong S. Leong<sup>1</sup>, Michelle  
5 T.T. Chan<sup>2,4</sup>, Cody A. Despins<sup>1</sup>, Anita Mueller<sup>1</sup>, Dionne Sakhrani<sup>2</sup>, Carlo A. Biagi<sup>2</sup>, Quentin  
6 Rougemont<sup>5,6</sup>, Eric Normandeau<sup>5</sup>, Steven J.M. Jones<sup>7</sup>, Robert H. Devlin<sup>2</sup>, Ruth E.  
7 Withler<sup>3</sup>, Terry D. Beacham<sup>3</sup>, Kerry A. Naish<sup>8</sup>, José M. Yáñez<sup>9,11</sup>, Roberto Neira<sup>10,11</sup>, Louis  
8 Bernatchez<sup>5</sup>, William S. Davidson<sup>4</sup>, Ben F. Koop<sup>1</sup>.

9

10 **Affiliations**

11 1: Department of Biology, Centre for Biomedical Research, University of Victoria,  
12 Victoria, BC, V8W 2Y2, Canada

13 2: Fisheries and Oceans Canada, 4160 Marine Drive, West Vancouver, BC, V7V 1N6,  
14 Canada

15 3: Fisheries and Oceans Canada, Pacific Biological Station, 3190 Hammond Bay Road,  
16 Nanaimo, BC, V9T 6N7, Canada

17 4: Department of Molecular Biology and Biochemistry, Simon Fraser University,  
18 Burnaby, V5A 1S6, Canada

19 5: Institut de Biologie Intégrative et des Systèmes (IBIS), Université Laval, Québec, QC,  
20 G1V 0A6, Canada

21 6: Current: CEFE, Univ Montpellier, CNRS, EPHE, IRD, Montpellier, France

22 7: Canada's Michael Smith Genome Sciences Centre, BC Cancer, Vancouver, British  
23 Columbia, Canada

24 8: School of Aquatic and Fishery Sciences, University of Washington, Seattle, WA 98105,  
25 USA

26 9: Facultad de Ciencias Veterinarias y Pecuarias, Universidad de Chile, Santa Rosa 11735,  
27 La Pintana, Santiago, Chile

28 10: Facultad de Ciencias Agronómicas, Universidad de Chile, Santa Rosa 11315, La  
29 Pintana, Santiago, Chile  
30 11: Millennium Nucleus of Austral Invasive Salmonids (INVASAL), Concepción, Chile  
31 \*equal contributions

32

### 33 **Corresponding authors**

34 Ben F. Koop: bkoop@uvic.ca

35 Kris A. Christensen: kris.christensen@wsu.edu

36

### 37 **Running Head**

38 coho salmon genome assembly

39

### 40 **Keywords**

41 Coho, Silver salmon, Pacific salmon, Genome assembly, SNPs, Demographic  
42 history, Genomics, Isolation-by-distance.

43

### 44 **Abstract**

45 Coho salmon (*Oncorhynchus kisutch*) are a culturally and economically important  
46 species that return from multiyear ocean migrations to spawn in rivers that flow to the  
47 Northern Pacific Ocean. Southern stocks of coho salmon have significantly declined over  
48 the past quarter century, and unfortunately, conservation efforts have not reversed this  
49 trend. To assist in stock management and conservation efforts, we generated two  
50 chromosome-level genome assemblies and sequenced 24 RNA-seq libraries to better  
51 annotate the coho salmon genome assemblies. We also resequenced the genomes of 83  
52 coho salmon across their North American range to identify nucleotide variants,  
53 characterize the broad effects of isolation-by-distance using a genome-wide association  
54 analysis approach, and understand the demographic histories of these salmon by  
55 modeling population size from genome-wide data. We observed that more than 13% of

56 all SNPs were associated with latitude (before multiple test correction), likely an affect  
57 of isolation-by-distance. From demographic history modeling, we estimated that the  
58 SNP latitudinal gradient likely developed as recently as 8,000 years ago. In addition, we  
59 identified four genes each harboring multiple SNPs associated with latitude; all of these  
60 SNPs were also predicted to modify the function of the gene. Three of these genes have  
61 roles in cell junction maintenance and may be involved in osmoregulation. This signifies  
62 that ocean salinity may have been a factor influencing coho salmon recolonization after  
63 the last glaciation period – generating the current pattern of variation in these three  
64 genes.

65

## 66 **Introduction**

67 Coho salmon have special cultural significance to the people of the First Nations  
68 in British Columbia and have traditionally been one of the highest-value Pacific salmon  
69 in the commercial and recreational fishery sectors. In 1977, a climatic regime shift in the  
70 North Pacific Ocean ushered in three decades of increasing global salmon production  
71 that culminated in 2009, when over 600 million salmon (1.1 million metric tonnes) were  
72 harvested [1]. However, this increased production of salmon masked substantial  
73 variability in regional abundances and species composition. Whereas the productivity  
74 and harvest of chum (*Oncorhynchus keta*), pink (*Oncorhynchus gorbuscha*), and sockeye  
75 salmon (*Oncorhynchus nerka*) increased throughout the North Pacific after 1977, the  
76 opposite was true for coho and Chinook salmon (*Oncorhynchus tshawytscha*). These  
77 declines became particularly acute after 1989 when marine survival for these species  
78 began a downward spiral that has yet to be reversed [1, 2]. A severe decline in the  
79 highly lucrative recreational coho salmon fishery in the Strait of Georgia saw the  
80 numbers of fish caught decline from an average of over 500,000 to less than 100,000  
81 throughout the 1990s [3]. In 2004, the recreational catch in the Strait of Georgia was  
82 9,500 coho salmon [4].

83 In British Columbia (BC), the Salmon Enhancement Program (SEP) was launched

84 to double salmon production with the establishment of 18 major Department of  
85 Fisheries and Oceans (DFO) operated hatchery facilities and spawning channels.  
86 Throughout a stable harvest period of the 1980s, SEP releases of coho salmon juveniles  
87 increased from 5 to over 20 million, and the proportion of hatchery salmon in the  
88 fisheries increased from 5 to 20%. A precipitous decline in coho salmon production  
89 occurred in the 1990s. The decline was even more dramatic in the inner waters of the  
90 Strait of Georgia and Puget Sound. By the end of the decade, the commercial coho  
91 salmon fishery was closed and 'marked or hatchery-only' recreational fisheries had been  
92 instituted as a wild coho salmon conservation measure in southern BC.

93         The concern that hatchery fish were replacing wild fish was raised and, indeed,  
94 by 1998 70% of coho salmon in the Strait of Georgia were of hatchery origin [5]. From  
95 1998 to 2007, the survival of the Strait of Georgia coho salmon over the first four  
96 months after entering a marine environment (May-September) decreased from 15% to  
97 1% [2]. Processes associated with the low early marine survival remains unknown, but  
98 marine climatic changes were implicated and hatchery salmon survival was even lower  
99 than for wild salmon [2]. These results led to renewed calls for improved strategies for  
100 wild and hatchery coho salmon management, and a re-evaluation of wild-hatchery  
101 interactions in the species [2]. As such, a call was made to understand genetic influences  
102 on coho salmon survival and to produce high-quality genomic resources such as a  
103 chromosome-level reference genome assembly to enable technological support in  
104 informing management practices and decision within this species.

105         In a large-scale coho salmon population structure analyses of coho salmon  
106 sampled from 318 localities, in 38 different regional groups in North America and Russia  
107 (representing most of the natural distribution of coho salmon), 17 microsatellite loci  
108 showed that salmon clustered geographically and regions could be delineated along a  
109 north – south gradient, with reduced variation to the north and isolated inland  
110 populations [6]. These results were refined with increased genetic markers, finding that  
111 isolation-by-distance from a main southern glacial refugia after the last ice-age could

112 explain most of the patterns of genetic diversity in modern coho salmon across the  
113 North American distribution [7, 8]. These last two studies were supported by the  
114 reference genome assemblies described in this study and illustrate how important such  
115 resources are for understanding the basic biology of a species.

116         With this in mind, the goals of this study were to expand upon our basic  
117 understanding of the coho salmon genome and help build upon the knowledge of the  
118 already excellent framework of population structure mentioned above. Our method to  
119 do this was to construct a high quality, annotated reference genome assembly and by  
120 building a comprehensive inventory of genetic variation (SNPs) from a wide  
121 geographical distribution. From the complete SNP dataset, we were then able to expand  
122 upon what was known about isolation-by-distance and demographic history of coho  
123 salmon. RNA-seq data for various tissues were also generated to facilitate genome  
124 annotation by the NCBI.

125

126

## 127 **Materials and Methods**

### 128 *Coho salmon samples for genome assembly*

129         All animals were reared in compliance with the Canadian Council on Animal Care  
130 Guidelines, under permit from the Fisheries and Oceans Canada Pacific Region Animal  
131 Care Committee (under Ex.7.1). Using Inch Creek coho salmon, we generated fully  
132 homozygous diploid gynogenetic individuals (doubled haploids) to help improve genome  
133 assembly quality (as noted in [9]). For details on doubled haploid generation and DNA  
134 extraction methods, please see the Supplemental Methods section. Tissues were also  
135 collected for RNA-seq and included kidney, heart, head kidney, spleen, gill, nares, ovary,  
136 white muscle, brain, eye, gut, liver, skin, stomach, and pyloric caecum. See the  
137 Supplemental Methods for further details on RNA extraction.

138

### 139 *Genome sequence and assembly – Version 1*

140 A common sequencing and assembly pipeline for salmonids was used for this  
141 version of the genome assembly (e.g., [10–12]). Full details of sequencing and genome  
142 assembly can be found in the Supplemental Methods section. A brief description of the  
143 assembly involved generating Illumina libraries (mate-pair and paired end), generating  
144 PacBio data, and assembling the Illumina sequence data using Allpaths-LG [13] followed  
145 by scaffolding with PacBio data using PBJelly [14]. All sequencing data related to this  
146 genome assembly and annotation were submitted to the NCBI under BioProject  
147 Accession: PRJNA352719. Genome completeness was assessed using BUSCO (v3.0) [15],  
148 with default settings aside from “-sp zebrafish” using the ODB9 Actinopterygian  
149 database.

150 A circos plot (v0.69-4) was generated to show the relationship of homeologous  
151 chromosome resulting from the salmonid specific genome duplication [16, 17] for both  
152 versions of the genome assembly. For further details of the circos plot see Supplemental  
153 Methods.

154

#### 155 *Genome sequence and assembly – Version 2*

156 Version 2 of the coho salmon genome assembly incorporated 10X chromium  
157 data, Hi-C data, and new PacBio data with the previous Illumina sequencing and PacBio  
158 data generated for the first version. Some of this data came from a different doubled-  
159 haploid coho salmon individual compared to the first version. For full details of  
160 sequencing and assembly methodology see Supplemental Methods.

161

#### 162 *Transcriptome and annotation*

163 RNA-seq data was generated from 15 tissues taken from the same doubled-  
164 haploid coho salmon used to produce the first genome assembly. RNA-seq data was also  
165 generated from two other coho salmon for this project, including: spleen, head kidney,  
166 kidney, gill, and gut (gut was only from one of the two salmon). In total, RNA from 24  
167 tissues were sent for library construction and sequencing at the Michael Smith Genome

168 Sciences Centre (Vancouver, BC, Canada). Eukaryotic single-strand RNAseq libraries  
169 were prepared and sequenced across 7 lanes of PE125 sequencing on an Illumina  
170 HiSeq2500. Four tissues were pooled per lane except brain, ovary, liver and gut from the  
171 genome individual (DH3), which were pooled two per lane. Sequences were submitted  
172 to NCBI under SRR5333359-SRR5333382 for eventual inclusion in the standard NCBI  
173 Eukaryotic Genome Annotation pipeline, which has been used on many genome  
174 assemblies. This data was generated for use in the NCBI annotation (Version 2), but was  
175 not used in any other way in this study.

176

#### 177 *Repeat library*

178 A species-specific repeat library was generated for coho salmon using the  
179 methodology developed for salmonids in [18], and fully described in [10]. In brief, the  
180 Atlantic salmon repeat library [18], was combined with repetitive sequences from the  
181 RepBase database [19]. The RepBase sequences were derived from the Salmoniformes  
182 family. They excluded simple repeats. RepeatModeler v1.0.8 [20] was also used  
183 together with the genome assembly in a *de novo* approach. The repetitive sequences  
184 were then aligned to the coho genome with BLASTN [21]. Sequences were classified into  
185 either high-confidence or low-confidence categories based on frequency and length.  
186 Low-confidence repeats were removed, and after filtering all of the sequences were  
187 compared to each other using an all-by-all BLASTN search. A redundancy filter was  
188 applied, prioritizing longest and highest-confidence repeats where two sequences were  
189 considered to overlap.

190

#### 191 *Whole-genome resequencing and nucleotide variant calling*

192 Whole-genome resequencing was used to characterize broad genomic  
193 characteristics across the coho salmon's North American range. Table 1 contains a list of  
194 sampled locations (see File S1 for more information). We included one commercial  
195 strain from Chile as well (Table 1).

196 DNA was extracted from fin-clips using the DNeasy Blood and Tissue extraction  
197 kit (Qiagen) or a MagMAX DNA Multi-Sample Ultra Kit with a KingFisher (ThermoFisher  
198 Scientific). Following DNA extraction, samples were quantified by Qubit BR DNA assay  
199 (ThermoFisher) and integrity validated by agarose gel electrophoresis. At McGill  
200 University and Genome Québec Innovation Centre (Montreal, QC, Canada), individual  
201 Illumina libraries were constructed with Illumina TruSeq LT sample preparation kits, and  
202 each individual was sequenced separately on a lane of Illumina HiSeq2500 PE125 or in  
203 batches of four on a HiSeqXTen (PE150) lane, targeting approximately 15-30X coverage.  
204 Resequenced genomes were submitted to the NCBI under BioProject:PRJNA401427 and  
205 PRJNA808051 (File S1).

206 Nucleotide variant calling on the dataset followed GATK3 best practices where  
207 possible. BWA-MEM v0.7.17 [22] was used to align Illumina data to the reference  
208 genome (version 2), with -M option for Picard compatibility. The Picard v2.18.9 [23]  
209 AddOrReplaceReadGroups program was used to add read group IDs, and the  
210 MarkDuplicates program was used to mark duplicates (default settings). GATK v3.8 [24,  
211 25] was then used to call genotypes. Base and variant recalibration were each  
212 performed once (for two rounds through genotyper). The variants used for recalibration  
213 were from 1) a reduced set of very high-confidence calls following default “hard-  
214 filtering” guidelines from GATK documentation from the first round of genotyping with a  
215 particular focus on coding regions, and 2) validated SNPs on a 200K Affymetrix SNParray  
216 [26].

217 Following genotyping, VCFtools v0.1.15 [27] was used to additionally thin data to  
218 only include biallelic SNPs with a minor allele frequency of 0.05 or greater, variants with  
219 fewer than 10% missing genotypes, and variants with a mean coverage between 5 and  
220 200. Minor allele frequency was not used for filtering in the SMC++ analysis (below).  
221 Some individuals were removed at this point from the VCF file because they were not  
222 intended for this study (see NCBI BioProject: PRJNA808051 and File S1 for removed  
223 samples). They were included as it was more computationally efficient to call all



224 individuals at the same time. Finally, the SNPs were filtered for linkage disequilibrium to  
225 reduce the influence of large haploblocks in the principal components analysis (PCA)  
226 (bcftools [28] version 1.9-102-g958180e +prune -w 20kb -l 0.4 -n 2).

227

### 228 *Whole-genome analyses*

229 A PCA was performed with variants that had been filtered for linkage  
230 disequilibrium (see previous paragraph) using PLINK [29, 30] v1.90b6.15 with default  
231 parameters. PLINK was also used to identify and quantify runs of homozygosity using  
232 default settings (Figure S1). For comparison, we also performed the analysis with the  
233 following parameters (Figure S2): min SNP count – 100, min length – 100 kb, max  
234 inverse density – 50 kb/SNP, max internal gap 100 kb, max heterozygous genotypes 1,  
235 SNP scanning window size – 100, min scanning window hit rate – 0.05, max missing calls  
236 – 20.

237 Private allele counts per river were tallied using the populations module in  
238 Stacks [31, 32] version 2.54 with default parameters. Populations with more than five  
239 individuals were randomly subsampled to five to reduce the influence of uneven  
240 sampling on the number of private alleles identified. Stacks was also used to calculate  
241 other population level metrics such as observed heterozygosity, nucleotide diversity ( $\pi$ ),  
242 and  $F_{is}$  with default settings.

243 A genome-wide association (GWA) analysis was performed to characterize the  
244 extent of isolation-by-distance previously reported by several authors (e.g., [7, 33]). The  
245 trait of interest under investigation was latitude (the Chile strain of coho salmon was  
246 excluded from this analysis). We used PLINK with default settings to perform this  
247 analysis. Population structure was not included in this analysis as a covariate because  
248 we were trying to characterize the fraction of the genome with a north – south gradient  
249 and adding this covariate would remove much of that variation. R [34] and the qqman  
250 package in R [35] were used to visualize the GWA analysis.

251 We tested for gene ontology enrichment based on the annotated variants that

252 were associated with the north – south gradient (for variants that were ‘moderately’  
253 likely to influence gene function and for those having ‘low’ or ‘moderate’ likelihood).  
254 SnpEff [36] version 5.0e and the gene annotation from the NCBI were used to annotate  
255 nucleotide variants for potential function alterations using default settings. Blast2GO  
256 [37] and OmicsBox [38] version 2.0.36 were used to test for enriched GO categories  
257 using default parameters.

258 To infer demographic histories of the salmon from the various rivers, we used  
259 SMC++ [39] version 1.15.4.dev18+gca077da. In this analysis, we set the mutation rate to  
260  $8e-9$  bp/generation and the generation time to 3 years. These parameters were  
261 previously used in another coho salmon study examining demographic histories [7]. We  
262 used nucleotide variants that were not filtered for rare variants (e.g., MAF < 0.05). We  
263 also used the --missing-cutoff option (50 kbp) in SMC++ to reduce the influence of  
264 missing genotypes (e.g., in centromeres).

265

266

## 267 **Results**

### 268 *Genome assemblies*

269 The size of both versions of the coho salmon genome assembly was 2.3 Gb,  
270 which is also the same size of the closely related Chinook salmon (*O. tshawytscha*)  
271 genome assembly [40]. However, version 2 of the coho salmon genome assembly was  
272 much more contiguous than version 1 and had a more complete gene set (inferred from  
273 BUSCO completeness). There was an almost 20x fold increase in contig N50 between  
274 version 1 (58 kb) and version 2 (1,159 kb) of the genome assembly (Table 2). Likely as a  
275 consequence of the increase in contiguity, the number of complete BUSCOs rose from  
276 91% to 99%, which is comparable to the human genome assembly at 99% [41]. The  
277 proportion of repeats also rose from 44.82% to 53.12% (compared to 52.94% in Chinook  
278 salmon), and the number of annotated genes increased from 41,179 to 60,330 (47,105  
279 in Chinook salmon). The NCBI reported that from version 1 to version 2, 37% of the

280 genome annotations were new and that 16% of the annotations on version 2 required  
281 major changes from the previous version [42]. We note that the genome assembly was  
282 produced from sequence data from two coho salmon and therefore not haplotype  
283 resolved but chimeric in nature.

284         The coho salmon genome has extensive signatures of chromosomal duplication  
285 (Figure 1, Table 2), which have been retained from the whole genome duplication  
286 common to all salmonids [17]. The majority of duplicated regions from the salmonid-  
287 specific genome duplication have diverged to a point where it is relatively easy to  
288 differentiate between the copies (Figure 1,  $\leq 90\%$  identity), but certain sections of the  
289 genome have retained high-sequence similarity where it is difficult to distinguish  
290 between copies (Figure 1). Regions with very high-sequence similarity remain as  
291 unplaced scaffolds as it was not possible to resolve which sequence belonged to which  
292 duplicated region (see assembly methods; available on the NCBI website [43]). The  
293 number of duplicate BUSCOs increased from 37% to 42.2% between versions (Table 2),  
294 which suggests that the second assembly was able to distinguish between similar  
295 paralogs/homeologs better whereas the first assembly likely collapsed them into a  
296 single gene/BUSCO.

297         The coho salmon genome also has a high retention of repetitive elements (Figure  
298 1, Table 2), which is another commonality of studied salmonids (e.g., [12, 18]). This is  
299 especially true in regions near the centromere where the fraction of repetitive elements  
300 is roughly 75% (Figure 1). That value is high compared to the genome average of 53%  
301 (Table 2). For comparison, the most recent version of the Chinook salmon genome also  
302 has a repeat content of 53% [44].

303

#### 304 *Population genomics*

305         A PCA of 83 resequenced coho salmon genomes sampled from across North  
306 America (and aquaculture samples), revealed that coho salmon clustered by region with  
307 the exceptions of the Salmon River and Inch Creek (Figure 2). On the first principal

308 component of the PCA, the Salmon River clustered away from all the other samples. This  
309 river belongs to the Thompson River watershed, and coho salmon from this region have  
310 previously been observed to cluster in a similar manner [7]. Inch Creek salmon might  
311 cluster separately as an artifact since the genome assembly was derived from an Inch  
312 Creek salmon. This might increase read-alignment scores and influence SNP-calling in  
313 some regions of the genome.

314 Excluding the Salmon River and Inch Creek samples, all other samples clustered  
315 by region and by latitude in a manner consistent with isolation-by-distance suggested by  
316 [7]. The Salmon River group have the lowest private allele counts (1,876 vs. a median of  
317 4,188) and observed heterozygosity (0.22966 vs. a median of 0.285565). They also have  
318 the highest total runs of homozygosity (Figures S1 and S2). The region with the highest  
319 private allele count appears to be around the Puget Sound (e.g., Wallace River, private  
320 allele count = 5,546) and Strait of Georgia regions (e.g., Capilano River, private allele  
321 count = 6,415). Most of the northern rivers have low private allele counts with the  
322 exception of the Kitimat River (private allele count = 6,341), which has the second  
323 highest count (Figure 2).

324 To investigate how much of the genome has been influenced by isolation-by-  
325 distance, we quantified the number of SNPs associated with the latitude gradient  
326 observed from the PCA above (Figure 3, File S2). Roughly 13.9-33.8% of the 5,631,459  
327 variants were associated with latitude at a significance level of 0.01-0.1 without multiple  
328 test corrections (Figure 3). The proportion of variants associated with latitude dropped  
329 to 0.07% after the alpha threshold was set to 0.05 with a Bonferroni correction (these  
330 variants were widely distributed throughout the genome).

331 In Table 3, the most common nucleotide variant annotations from SNPeff are  
332 shown, with intronic and intergenic variants being the most common type of variant  
333 annotation. The variants that were significantly associated with latitude (see previous  
334 paragraph, 0.07%) have a similar broad distribution of annotations relative to the entire  
335 genome rather than enriched for variants that are likely to influence gene function

336 (Table 3, File S2). For instance, the percent of intergenic nucleotide variants remained at  
337 31.2% of the total number of variants for the whole genome and for variants that were  
338 significantly associated with latitude (Table 3). We would expect that if variants were  
339 influencing traits under selection (e.g., based on latitude), the distribution would change  
340 between all variants and those significantly associated with latitude if those SNPs  
341 influenced gene function (e.g., 3' UTR and missense annotations).

342 Significant latitude-associated nucleotide variants (0.07%) identified in the GWA  
343 analysis that were annotated as having a 'Moderate' likelihood to influence gene  
344 function by SnpEff were found in 45 genes (File S2). Of these 45 genes, 4 genes had two  
345 or more variants that were annotated as 'Moderate' in their impact on gene function  
346 (Figure 4). No enriched gene ontologies were identified from genes with 'Moderate' or  
347 even 'Moderate' + 'Low' (87 genes) nucleotide variant annotations (File S2). Only when  
348 all genes with associated variants were tested, regardless of influencing function, did we  
349 observe enriched GO terms (data not shown).

350 To put the nucleotide variation generated by isolation-by-distance into a broader  
351 context, we identified possible times when northern populations could have recolonized  
352 after the last glaciation period. By modeling demographic histories from genome  
353 sequences using the SMC++ program, we were able to identify major decreases in  
354 effective population size ( $N_e$ ) that correspond with the Cordilleran Ice Sheet maximum  
355 and the presumed penultimate global glacial maximum (Figure 5). We also observed  
356 that for some populations, mostly northern, there was an additional drop in effective  
357 population size between 3,750 and 8,000 years ago (Figure 5).

358

359

## 360 Discussion

361 As with previous analyses of salmonid genomes [10, 12, 17, 18, 45, 46], the  
362 retention of duplicated chromosomes (i.e., homeologs) from the salmonid-specific  
363 whole genome duplication [17] is a defining feature of the coho salmon genome. Some

364 of the duplicated regions have likely retained very high sequence similarity for roughly  
365 90 million years (time estimate from [17, 45, 47]). A possible mechanism for high  
366 sequence similarity retention is through tetrasomic inheritance [48].

367 The second version of the coho salmon genome assembly resolved a greater  
368 number of duplicated regions of the genome compared to the first version. The better  
369 resolution of duplicated regions can be observed with the increase in gene count and  
370 the number of duplicated BUSCOs identified. Finer detail in these regions may help us in  
371 future studies to better understand the residual impacts of whole genome duplication  
372 on the biology of salmon.

373 From resequenced coho salmon genomes, we were able to better understand  
374 population structure of coho salmon and its relationship with isolation-by-distance. One  
375 of the striking features of the PCA of coho salmon populations was how divergent  
376 Salmon River salmon were to all other populations. The Salmon River is part of the  
377 Thompson River watershed and coho salmon from this system were thought to be  
378 isolated from all other populations for potentially 150,000 years before secondary  
379 contact roughly 13,500 years ago (essentially during the previous glacial period) [7]. This  
380 would be consistent with findings in kokanee (*O. nerka*, a landlocked sockeye salmon  
381 ecotype) in the upper Columbia River that similarly appear divergent from all other  
382 populations of sockeye salmon and kokanee [12]. Taken together, these pieces of  
383 evidence might be interpreted as support for a glacial refugium near the intersection of  
384 the Cordilleran Ice Sheet and the Laurentide Ice Sheet.

385 A more likely alternative is that another unknown factor was influencing past  
386 analyses and the PCA from the current study. The Salmon River coho salmon have  
387 increased runs of homozygosity, reduced heterozygosity, and reduced private alleles,  
388 which are indicators of a recent and extensive bottleneck. We were also able to infer  
389 the demographic history from whole genome sequences of the Salmon River coho  
390 salmon and found evidence of a bottleneck (from  $\sim N_e$  16,227 to  $\sim N_e$  1,749) around  
391 4,000 years ago. These results could help explain why the Salmon River coho salmon

392 appear so divergent in a PCA, as low genetic diversity might be expected to increase the  
393 amount of variation in the analysis since most of the other individuals do not have low  
394 genetic diversity. We only collected samples from one tributary of the Thompson River  
395 (a part of a much larger basin) and can only suggest that a plausible hypothesis from this  
396 data is that recolonization of the Salmon River from a small founding population took  
397 place after glaciers receded. We did not account for the influence of hatcheries, which  
398 could also influence many of the metrics discussed above. Also, we did not incorporate  
399 linked selection in demographic modeling as the type of analysis that we used was not  
400 amenable. Without linked selection accounted for, there could be biases in times and  
401 effective population sizes from our estimates [49]. Based on all the genetic diversity  
402 metrics (above), demographic modeling, and what has previously been published on the  
403 time of the most recent glacial maximum [50], however, recent recolonization of the  
404 Salmon River remains a likely alternative hypothesis to a glacial refugium between ice  
405 sheets.

406         Most other streams, except Inch Creek, clustered in the PCA based largely on  
407 latitude for both PC1 and PC2 of the PCA. With a much more extensive sampling  
408 strategy, Rougemont et al. (2020) found a similar trend and tested various demographic  
409 histories [7]. The authors of that study found that the best supported model was a  
410 glacial refugia to the south with recolonization of the northern streams after glacial  
411 retreat – generating genomic signatures of isolation-by-distance. The private allele  
412 analyses from the current study also supports this interpretation. The private allele  
413 analysis identified that most of the northern streams have low private allele counts  
414 compared to southern streams.

415         To better understand the pattern of genomic isolation-by-distance along the  
416 latitude gradient, we performed a GWA analysis based on stream latitude. We found  
417 that 13.9% of the variants were associated with latitude based on a *p*-value of 0.01  
418 without multiple test correction. To put this into perspective, the north – south gradient  
419 likely formed after the last Cordilleran Ice Sheet maximum 19-20,000 years ago [50] but

420 could have formed later between 3,750-8,000 years ago based on our demographic  
421 history modeling. This would suggest that a large fraction of the nucleotide variants  
422 responded within less than 8,000 years to the influence of isolation-by-distance.

423 We analyzed the influence of significantly associated nucleotide variants on gene  
424 function and also the distribution of annotated variants to better understand if selection  
425 played a large role in establishing the north – south gradient. We tested if genes with  
426 significantly associated variants ( $\alpha = 0.05$ , Bonferroni-correction), with ‘Low’ to  
427 ‘Moderate’ likelihoods of influencing gene function, belonged to any enriched GO  
428 categories. If a trait was under selection based on latitude, we might expect enriched  
429 GO terms associated with that trait. We did not find any enriched GO categories from  
430 the GWA analysis. This may indicate that selection may not have contributed much to  
431 establishing the north – south gradient.

432 When comparing the distribution of the most common variant annotations of  
433 the full dataset with the variants that were significantly associated with latitude, the  
434 largest fold difference was between the missense mutations (Table 3). We observed a  
435 ~2x difference from 0.8% missense mutation rate in the entire genome to 1.7% in the  
436 variants associated with latitude. While this increase does suggest selection may have  
437 contributed to the development of the latitude gradient, we interpret that, because the  
438 majority of the other annotations have similar frequencies, the majority of the variants  
439 that make up the gradient are not under direct selection. Further, the increase in  
440 missense mutations may represent slightly deleterious variants that escaped selective  
441 pressure during postglacial recolonization and expansion. Linked selection could still  
442 play a larger role but was not investigated here.

443 With or without selection, the north – south gradient of nucleotide variants likely  
444 influences some phenotypic differences in a similar gradient. As an example, we  
445 identified genes that had multiple nucleotide variants that are predicted to moderately  
446 influence gene function, and which also have an association with latitude. These  
447 included the rhotekin-like (*RTKN*, unknown function [51]), plectin-like (*PLEC*, giant



448 cytoskeleton scaffold [52]), PH and SEC7 domain-containing protein 4-like (*PSD4*, tight  
449 junctions maintenance [53]), and GTPase IMAP family member 9-like (*Gimap9*, possibly  
450 involved in T-cell development [54, 55]) genes. The nucleotide diversity of these genes  
451 largely arises from the frequency of the alternative allele in the four most northern  
452 streams – regions that would have likely been recolonized most recently assuming a  
453 main southern glacial refugium.

454 Interestingly, *PLEC* is a candidate gene associated with migration distance in  
455 brown trout (*Salmo trutta*), perhaps through its role in osmoregulation [56]. Cells  
456 without *PLEC* were found to be more sensitive to changes in osmolarity (shrinking more  
457 after exposure to urea) [57], and hatch-stage whitefish (*Coregonus lavaretus*) exposed  
458 to high salinity have significantly higher *PLEC* protein expression [58]. Two of the other  
459 genes with multiple variants moderately-likely to modify gene function and which were  
460 associated with the north – south latitudinal gradient, *RTKN* and *PSD4*, may also have  
461 roles in salinity tolerance. An Atlantic cod (*Gadus morhua* L.) nucleotide variant in the  
462 intron of *PSD4* was found to be associated with a salinity gradient between the North  
463 Sea and the Baltic Sea [59]. Likewise, researchers discovered that Rho (*RTKN* is an  
464 effector protein of RhoA [51, 60]), is activated by hyperosmotic stress [61].

465 *PLEC*, *PSD4*, and *RTKN* all appear to be involved in cell junction functionality. Cell  
466 junctions observed in a *PLEC* knockout cell line appeared to be compromised [62], *PSD4*  
467 (also known as EFA6B) is required for efficient tight junction formation [63], and *RTKN*  
468 influences cell junctions through PIST [51] and Septin proteins [51, 64]. It is thought that  
469 cellular tight junctions play an important role in water and salt balance in teleost fishes  
470 [65]. Considering that three of the four genes with multiple latitude associated  
471 nucleotide variants and which are moderately likely to alter gene function could impact  
472 cell junctions and osmoregulation, we hypothesize that ocean salinity may have  
473 influenced coho salmon recolonization of northern streams.

474 While, the Pacific Ocean salinity was thought to be ~4% higher during the last  
475 glacial maximum as freshwater was stored in glaciers [66], it is difficult to predict how

476 the salinity gradient observed in modern times [67] might have been influenced as  
477 glaciers began to retreat (when northern recolonization would have been possible). If  
478 there was a difference in salinity between northern and southern regions, nucleotide  
479 variation in these genes may have facilitated northern colonization in some way.

480 From inferred demographic histories, we were able to estimate a recolonization  
481 date of some northern streams (based on the founder effect that would be expected to  
482 accompany recolonization) to between 3,750-8,000 years ago. This places an upper limit  
483 on the age of the latitude gradient and how swiftly such a gradient can form. These  
484 values are based on assumptions of a mutation rate of  $8e-9$  bp/generation and a  
485 generation time of three years. Linked selection may also bias our time and effective  
486 population estimates [49] as we did not account for them in modeling.

487 While it is important to remember that time and population estimates are  
488 influenced by many factors when inferring demographic histories from sequence data,  
489 multiple lines of evidence can be used to strengthen these inferences or put them in a  
490 more realistic context. Radiometric evidence supports that the Cordilleran Ice Sheet  
491 maximum occurred between 19,000 and 20,000 years ago [50]. Likewise, chemical  
492 properties of gases in Antarctic ice cores support this termination of the last glaciation  
493 period (Termination I) to roughly the same time period, as well as a previous  
494 termination of the penultimate glaciation period around 138,000 and 148,000 years ago  
495 (Termination II) [68]. In the demographic histories of the coho salmon, we noted  
496 dramatic declines of nearly all salmon populations for both these time periods. This  
497 observation supports the parameters used for modeling the demographic histories as  
498 we expect that populations might decline in response to increased glaciation or rapid  
499 climate change.

500 The overall trend we observed from modeling demographic histories was major  
501 drops in effective population size at each transition from glaciation to inter-glaciation  
502 period with increases for nearly all populations after the penultimate glaciation period  
503 and uncommon increases for specific rivers after the most recent glaciation period. At a

504 species level, these transitional drops likely influence multiple aspects of coho salmon  
505 biology since genetic variability can contribute to many characteristics of a species.

506

## 507 **Conclusions**

508 In this study, we generated two reference genome assemblies as tools for  
509 conservation and management of coho salmon. Additionally, we resequenced the  
510 genomes of a wide distribution of coho salmon from rivers along North America. We  
511 were able to identify a north – south gradient in the nucleotide variation of the  
512 genomes, which had been observed in previous studies. To add to previous  
513 observations, we quantified that approximately 13.9% of the variation in the  
514 resequenced genomes followed the north – south gradient. We also were able to  
515 estimate that the age of the north – south gradient is likely under 8,000 years of age.  
516 This gradient likely contributes to phenotypic diversity between northern and southern  
517 rivers since we identified gene modifying variants that were associated with the latitude  
518 gradient. Finally, we modeled demographic histories of the coho salmon from different  
519 rivers and discovered that major drops in effective population size were related to  
520 changes between glacial and inter-glacial periods. We believe the coho salmon genome  
521 assemblies will facilitate research to better understand coho salmon biology and may  
522 enhance management of this culturally and economically important species.

523

## 524 **Data availability**

525 Raw data for the genome assembly was submitted to the NCBI under the BioProject  
526 PRJNA352719. Whole genome resequencing data was submitted under PRJNA401427  
527 and PRJNA808051 to the NCBI BioProjects (see File S1 for specific samples used in this  
528 study). The VCF file used for analyses in this study was submitted to the GSA Figshare  
529 portal.

530

## 531 **Acknowledgements**

532 We would like to acknowledge the extensive help from many individuals who  
533 contributed to work in sampling and sequencing in this work. For sequencing, we thank  
534 the staff at the McGill University and Genome Québec innovation Center as well as the  
535 Genome Sciences Centre who provided library prep and sequencing for PacBio long read  
536 libraries and individual coho resequencing work. We also thank the staff at the Michael  
537 Smith Genome Sciences Centre in Vancouver BC who performed library prep and  
538 sequencing for Illumina libraries used in genome assembly and RNA-seq libraries used in  
539 Genome annotation. The annotation work itself relied on the NCBI Eukaryotic Genome  
540 annotation pipeline and the wonderful staff who support this work. Sample collection  
541 involved a number of people, many of which remain anonymous to the authors, but we  
542 thank them for all their efforts. Coordinating sample collections were Heather Hoyt of  
543 the Alaskan Department of Fish and Game for samples from Alaska, Christian Smith at  
544 the US Fish and Wildlife's Abernathy Fish technology Center for samples in Washington  
545 State and Oregon, John Carlos Garza at the NOAA Southwest Marine Fisheries Sciences  
546 Centre for samples collected in Klamath River, Justin Henry and Bruce Swift for samples  
547 from Aquaculture broodstock from Northern Divine Aquafarms Ltd (formerly Target  
548 Marine), and from Riverence LLC for Aquaculture broodstock. We would finally like to  
549 thank Compute Canada (Cedar) for computational resources.

550

## 551 **Funding**

552 This project was supported by a large-scale Genome Canada strategic grant  
553 entitle EPIC4 – Enhanced Production in Coho: Culture, Community Catch (grant ID:  
554 229COH, Genome Canada). In addition, funding and contributions were provided by  
555 Riverence LLC, Northern Divine Aquafarms. EBR was supported during this work by an  
556 NSERC PGSD3 grant, and both EBR and KAC were supported by a NSERC Visiting Fellow  
557 in a Government Laboratory (DFO) fellowship. MTC was supported by SFU Graduate  
558 Dean Entrance Scholarship, SFU Provost Prize of Distinction and Garfield Weston  
559 Foundation. Funding from the Canadian Regulatory System for Biotechnology was

560 provided to support production of doubled haploids.

561

## 562 **Author Contributions**

563 EBR, KAC, JSL, and BFK performed genome assembly, chromosome assembly,  
564 genome submission, and generated genome metrics. DRM performed repeat library  
565 construction. EBR, CAD, MTC, AM, and DS performed wet-lab work including DNA and  
566 RNA extractions and mitochondrial sequencing. EBR, QR, EN, DRM, and JSL performed  
567 SNP calling and population genomic analyses. RHD, MTC, DS, and CB generated, raised,  
568 and dissected doubled-haploid samples for the genome assembly and transcriptome.  
569 REB, TDB, KAN, and JMY provided samples used in resequencing work. KAN provided  
570 early access to linkage map and additional guidance on its use. RHD, REW, TDB, KAN,  
571 JMY, RN, LB, WSD, SJMJ, and BFK initiated, planned and supervised the project. EBR,  
572 KAC, DRM and BFK wrote first draft of the manuscript.

573

574

## 575 **References**

1. Irvine JR, Fukuwaka M. Pacific salmon abundance trends and climate change. *ICES J Mar Sci.* 2011;68:1122–30.
2. Beamish RJ, Sweeting RM, Lange KL, Noakes DJ, Preikshot D, Neville CM. Early Marine Survival of Coho Salmon in the Strait of Georgia Declines to Very Low Levels. *Mar Coast Fish.* 2010;2:424–39.
3. Beamish RJ, McFarlane GA, Thomson RE. Recent declines in the recreational catch of coho salmon (*Oncorhynchus kisutch*) in the Strait of Georgia are related to climate. *Can J Fish Aquat Sci.* 2011. <https://doi.org/10.1139/f98-195>.
4. Kristianson G, Strongitharm D. *The Evolution of Recreational Salmon Fisheries in British Columbia.* Vancouver, BC: Pacific Fisheries Resource Conservation Council; 2006.
5. Noakes DJ, Beamish RJ, Sweeting R, King J. Changing the balance: Interactions between hatchery and wild Pacific coho salmon in the presence of regime shifts. *North Pac Anadromous Fish Commision Bull.* 2000;:155–63.

6. Beacham TD, Wetklo M, Deng L, MacConnachie C. Coho Salmon Population Structure in North America Determined from Microsatellites. *Trans Am Fish Soc.* 2011;140:253–70.
7. Rougemont Q, Moore J-S, Leroy T, Normandeau E, Rondeau EB, Withler RE, et al. Demographic history shaped geographical patterns of deleterious mutation load in a broadly distributed Pacific Salmon. *PLOS Genet.* 2020;16:e1008348.
8. Rougemont Q, Xuereb A, Dallaire X, Moore J-S, Normandeau E, Rondeau EB, et al. Long-distance migration is a major factor driving local adaptation at continental scale in Coho salmon. *Mol Ecol.* 2022;n/a n/a.
9. Zhang H, Tan E, Suzuki Y, Hirose Y, Kinoshita S, Okano H, et al. Dramatic improvement in genome assembly achieved using doubled-haploid genomes. *Sci Rep.* 2014;4:6780.
10. Christensen KA, Leong JS, Sakhrani D, Biagi CA, Minkley DR, Withler RE, et al. Chinook salmon (*Oncorhynchus tshawytscha*) genome and transcriptome. *PLOS ONE.* 2018;13:e0195461.
11. Rondeau EB, Minkley DR, Leong JS, Messmer AM, Jantzen JR, Schalburg KR von, et al. The Genome and Linkage Map of the Northern Pike (*Esox lucius*): Conserved Synteny Revealed between the Salmonid Sister Group and the Neoteleostei. *PLOS ONE.* 2014;9:e102089.
12. Christensen KA, Rondeau EB, Minkley DR, Sakhrani D, Biagi CA, Flores A-M, et al. The sockeye salmon genome, transcriptome, and analyses identifying population defining regions of the genome. *PLOS ONE.* 2020;15:e0240935.
13. Gnerre S, MacCallum I, Przybylski D, Ribeiro FJ, Burton JN, Walker BJ, et al. High-quality draft assemblies of mammalian genomes from massively parallel sequence data. *Proc Natl Acad Sci.* 2011;108:1513–8.
14. English AC, Richards S, Han Y, Wang M, Vee V, Qu J, et al. Mind the Gap: Upgrading Genomes with Pacific Biosciences RS Long-Read Sequencing Technology. *PLOS ONE.* 2012;7:e47768.
15. Simão FA, Waterhouse RM, Ioannidis P, Kriventseva EV, Zdobnov EM. BUSCO: assessing genome assembly and annotation completeness with single-copy orthologs. *Bioinformatics.* 2015;31:3210–2.
16. Krzywinski MI, Schein JE, Birol I, Connors J, Gascoyne R, Horsman D, et al. Circos: An information aesthetic for comparative genomics. *Genome Res.* 2009. <https://doi.org/10.1101/gr.092759.109>.

17. Allendorf FW, Thorgaard GH. Tetraploidy and the Evolution of Salmonid Fishes. In: Turner BJ, editor. *Evolutionary Genetics of Fishes*. Springer US; 1984. p. 1–53.
18. Lien S, Koop BF, Sandve SR, Miller JR, Kent MP, Nome T, et al. The Atlantic salmon genome provides insights into rediploidization. *Nature*. 2016;533:200–5.
19. Jurka J, Kapitonov VV, Pavlicek A, Klonowski P, Kohany O, Walichiewicz J. Repbase Update, a database of eukaryotic repetitive elements. *Cytogenet Genome Res*. 2005;110:462–7.
20. Smit A, Hubley R. RepeatModeler Open-1.0. 2013. <http://www.repeatmasker.org/>. Accessed 18 Dec 2017.
21. Camacho C, Coulouris G, Avagyan V, Ma N, Papadopoulos J, Bealer K, et al. BLAST+: architecture and applications. *BMC Bioinformatics*. 2009;10:1–9.
22. Li H. Aligning sequence reads, clone sequences and assembly contigs with BWA-MEM. *ArXiv13033997 Q-Bio*. 2013.
23. [github.com/broadinstitute/picard](https://github.com/broadinstitute/picard). Java. Broad Institute; 2020.
24. Van der Auwera GA, Carneiro MO, Hartl C, Poplin R, Del Angel G, Levy-Moonshine A, et al. From FastQ data to high confidence variant calls: the Genome Analysis Toolkit best practices pipeline. *Curr Protoc Bioinforma*. 2013;43:11.10.1-11.10.33.
25. McKenna A, Hanna M, Banks E, Sivachenko A, Cibulskis K, Kernytzky A, et al. The Genome Analysis Toolkit: A MapReduce framework for analyzing next-generation DNA sequencing data. *Genome Res*. 2010;20:1297–303.
26. Barría A, Christensen KA, Yoshida G, Jedlicki A, Leong JS, Rondeau EB, et al. Whole Genome Linkage Disequilibrium and Effective Population Size in a Coho Salmon (*Oncorhynchus kisutch*) Breeding Population Using a High-Density SNP Array. *Front Genet*. 2019;10:498.
27. Danecek P, Auton A, Abecasis G, Albers CA, Banks E, DePristo MA, et al. The variant call format and VCFtools. *Bioinformatics*. 2011;27:2156–8.
28. Danecek P, Bonfield JK, Liddle J, Marshall J, Ohan V, Pollard MO, et al. Twelve years of SAMtools and BCFtools. *GigaScience*. 2021;10:giab008.
29. Chang CC, Chow CC, Tellier LC, Vattikuti S, Purcell SM, Lee JJ. Second-generation PLINK: rising to the challenge of larger and richer datasets. *GigaScience*. 2015;4.
30. PLINK 1.9. <http://www.cog-genomics.org/plink/1.9/>. Accessed 1 Jun 2018.

31. Catchen J, Hohenlohe PA, Bassham S, Amores A, Cresko WA. Stacks: an analysis tool set for population genomics. *Mol Ecol*. 2013;22:3124–40.
32. Catchen JM, Amores A, Hohenlohe P, Cresko W, Postlethwait JH. Stacks: Building and Genotyping Loci De Novo From Short-Read Sequences. *G3 GenesGenomesGenetics*. 2011;1:171–82.
33. Smith CT, Nelson RJ, Wood CC, Koop BF. Glacial biogeography of North American coho salmon (*Oncorhynchus kisutch*). *Mol Ecol*. 2001;10:2775–85.
34. R Core Team. R: A Language and Environment for Statistical Computing. Vienna, Austria: R Foundation for Statistical Computing; 2020.
35. Turner SD. qqman: an R package for visualizing GWAS results using Q-Q and manhattan plots. *bioRxiv*. 2014;:005165.
36. Cingolani P, Platts A, Wang LL, Coon M, Nguyen T, Wang L, et al. A program for annotating and predicting the effects of single nucleotide polymorphisms, SnpEff: SNPs in the genome of *Drosophila melanogaster* strain w1118; iso-2; iso-3. *Fly (Austin)*. 2012;6:80–92.
37. Götz S, García-Gómez JM, Terol J, Williams TD, Nagaraj SH, Nueda MJ, et al. High-throughput functional annotation and data mining with the Blast2GO suite. *Nucleic Acids Res*. 2008;36:3420–35.
38. OmicsBox - BioBam | Bioinformatics Made Easy. BioBam. <https://www.biobam.com/omicsbox/>. Accessed 1 Mar 2022.
39. Terhorst J, Kamm JA, Song YS. Robust and scalable inference of population history from hundreds of unphased whole genomes. *Nat Genet*. 2017;49:303–9.
40. *Oncorhynchus tshawytscha* genome assembly Otsh\_v2.0. NCBI. [https://ncbi.nlm.nih.gov/data-hub/assembly/GCF\\_018296145.1/](https://ncbi.nlm.nih.gov/data-hub/assembly/GCF_018296145.1/). Accessed 6 Apr 2022.
41. *Homo sapiens* genome assembly GRCh38.p13. NCBI. [https://ncbi.nlm.nih.gov/data-hub/assembly/GCF\\_000001405.39/](https://ncbi.nlm.nih.gov/data-hub/assembly/GCF_000001405.39/). Accessed 6 Apr 2022.
42. *Oncorhynchus kisutch* Annotation Report. [https://www.ncbi.nlm.nih.gov/genome/annotation\\_euk/Oncorhynchus\\_kisutch/101/](https://www.ncbi.nlm.nih.gov/genome/annotation_euk/Oncorhynchus_kisutch/101/). Accessed 30 Mar 2022.
43. *Oncorhynchus kisutch* genome assembly Okis\_V2. NCBI. [https://ncbi.nlm.nih.gov/data-hub/assembly/GCF\\_002021735.2/](https://ncbi.nlm.nih.gov/data-hub/assembly/GCF_002021735.2/). Accessed 6 Apr 2022.



44. *Oncorhynchus tshawytscha* Annotation Report.  
[https://www.ncbi.nlm.nih.gov/genome/annotation\\_euk/Oncorhynchus\\_tshawytscha/101/](https://www.ncbi.nlm.nih.gov/genome/annotation_euk/Oncorhynchus_tshawytscha/101/). Accessed 6 Apr 2022.
45. Berthelot C, Brunet F, Chalopin D, Juanchich A, Bernard M, Noël B, et al. The rainbow trout genome provides novel insights into evolution after whole-genome duplication in vertebrates. *Nat Commun.* 2014;5.
46. De-Kayne R, Zoller S, Feulner PGD. A de novo chromosome-level genome assembly of *Coregonus* sp. “Balchen”: One representative of the Swiss Alpine whitefish radiation. *Mol Ecol Resour.* 2020;20:1093–109.
47. Macqueen DJ, Johnston IA. A well-constrained estimate for the timing of the salmonid whole genome duplication reveals major decoupling from species diversification. *Proc R Soc B Biol Sci.* 2014;281.
48. Allendorf FW, Bassham S, Cresko WA, Limborg MT, Seeb LW, Seeb JE. Effects of Crossovers Between Homeologs on Inheritance and Population Genomics in Polyploid-Derived Salmonid Fishes. *J Hered.* 2015;106:217–27.
49. Pouyet F, Aeschbacher S, Thiéry A, Excoffier L. Background selection and biased gene conversion affect more than 95% of the human genome and bias demographic inferences. *eLife.* 2018;7:e36317.
50. Clark PU, Dyke AS, Shakun JD, Carlson AE, Clark J, Wohlfarth B, et al. The Last Glacial Maximum. *Science.* 2009;325:710–4.
51. Ito H, Morishita R, Nagata K. Functions of Rhotekin, an Effector of Rho GTPase, and Its Binding Partners in Mammals. *Int J Mol Sci.* 2018;19:2121.
52. Winter L, Wiche G. The many faces of plectin and plectinopathies: pathology and mechanisms. *Acta Neuropathol (Berl).* 2013;125:77–93.
53. Zangari J, Partisani M, Bertucci F, Milanini J, Bidaut G, Berruyer-Pouyet C, et al. EFA6B Antagonizes Breast Cancer. *Cancer Res.* 2014;74:5493–506.
54. Wang Z, Li X. IAN/GIMAPs are conserved and novel regulators in vertebrates and angiosperm plants. *Plant Signal Behav.* 2009;4:165–7.
55. Limoges M-A, Cloutier M, Nandi M, Ilangumaran S, Ramanathan S. The GIMAP Family Proteins: An Incomplete Puzzle. *Front Immunol.* 2021;12.
56. Lemopoulos A, Uusi-Heikkilä S, Hyvärinen P, Alioravainen N, Prokkola JM, Elvidge CK, et al. Association Mapping Based on a Common-Garden Migration Experiment Reveals

Candidate Genes for Migration Tendency in Brown Trout. *G3 GenesGenomesGenetics*. 2019;9:2887–96.

57. Osmanagic-Myers S, Gregor M, Walko G, Burgstaller G, Reipert S, Wiche G. Plectin-controlled keratin cytoarchitecture affects MAP kinases involved in cellular stress response and migration. *J Cell Biol*. 2006;174:557–68.

58. Papakostas S, Vasemägi A, Vähä J-P, Himberg M, Peil L, Primmer CR. A proteomics approach reveals divergent molecular responses to salinity in populations of European whitefish (*Coregonus lavaretus*). *Mol Ecol*. 2012;21:3516–30.

59. Berg PR, Jentoft S, Star B, Ring KH, Knutsen H, Lien S, et al. Adaptation to Low Salinity Promotes Genomic Divergence in Atlantic Cod (*Gadus morhua* L.). *Genome Biol Evol*. 2015;7:1644–63.

60. Thumkeo D, Watanabe S, Narumiya S. Physiological roles of Rho and Rho effectors in mammals. *Eur J Cell Biol*. 2013;92:303–15.

61. Ciano-Oliveira CD, Sirokmány G, Szászi K, Arthur WT, Masszi A, Peterson M, et al. Hyperosmotic stress activates Rho: differential involvement in Rho kinase-dependent MLC phosphorylation and NKCC activation. *Am J Physiol-Cell Physiol*. 2003;285:C555–66.

62. Jirouskova M, Nepomucka K, Oyman-Eyrilmez G, Kalendova A, Havelkova H, Sarnova L, et al. Plectin controls biliary tree architecture and stability in cholestasis. *J Hepatol*. 2018;68:1006–17.

63. Théard D, Labarrade F, Partisani M, Milanini J, Sakagami H, Fon EA, et al. USP9x-mediated deubiquitination of EFA6 regulates de novo tight junction assembly. *EMBO J*. 2010;29:1499–509.

64. Kim J, Cooper JA. Junctional Localization of Septin 2 Is Required for Organization of Junctional Proteins in Static Endothelial Monolayers. *Arterioscler Thromb Vasc Biol*. 2021;41:346–59.

65. Chasiotis H, Kolosov D, Bui P, Kelly SP. Tight junctions, tight junction proteins and paracellular permeability across the gill epithelium of fishes: A review. *Respir Physiol Neurobiol*. 2012;184:269–81.

66. Insua TL, Spivack AJ, Graham D, D'Hondt S, Moran K. Reconstruction of Pacific Ocean bottom water salinity during the Last Glacial Maximum. *Geophys Res Lett*. 2014;41:2914–20.

67. Durack PJ, Wijffels SE, Matear RJ. Ocean Salinities Reveal Strong Global Water Cycle

Intensification During 1950 to 2000. *Science*. 2012;336:455–8.

68. Kawamura K, Parrenin F, Lisiecki L, Uemura R, Vimeux F, Severinghaus JP, et al. Northern Hemisphere forcing of climatic cycles in Antarctica over the past 360,000 years. *Nature*. 2007;448:912–6.

69. Wickham H. *ggplot2: Elegant Graphics for Data Analysis*. Springer-Verlag New York; 2016.

70. Becker RA, Wilks AR, Brownrigg R, Minka TP, Deckmyn A. *maps: Draw Geographical Maps*. 2018.

71. Chappellaz J, Barnola JM, Raynaud D, Korotkevich YS, Lorius C. Ice-core record of atmospheric methane over the past 160,000 years. *Nature*. 1990;345:127–31.

72. Alexander DH, Novembre J, Lange K. Fast model-based estimation of ancestry in unrelated individuals. *Genome Res*. 2009;19:1655–64.

576

## 577 **Figures**

578 **Figure 1. Circos plot of the first version of the coho salmon genome assembly.** In the

579 interior of the Circos plot are the links between duplicated regions of the

580 chromosomes/linkage groups (i.e., homeologous regions). A) Representations of the

581 chromosomes with the approximate position of the centromere marked by a filled

582 circle. The tick marks represent 10 Mbp intervals. B) The percent identity between

583 duplicated regions of the chromosome. The orange-red color represents very high

584 similarity (> 94%), the orange color high similarity (91-94%), the yellow moderate (88-

585 91%), and the green low (< 88%). C) The fraction of repetitive elements, with red

586 representing high (> 60%), yellow as moderate (35-60%), and green as low (< 35%).

587

588 **Figure 2. Influence of isolation-by-distance on coho salmon population structure.** A) A

589 PCA of coho salmon based on variants that were filtered for linkage disequilibrium

590 (plotted using ggplot [69]). Circles were drawn around Inch Creek and Salmon River

591 individuals to highlight that much of the variation of this PCA was due to differences of

592 salmon from these rivers. B) The same figure as A, with Salmon and Inch Creek salmon  
593 removed. When Inch Creek and Salmon River salmon are removed from the graph, the  
594 influence of latitude/isolation-by-distance can be observed on PC1 and PC2. Individuals  
595 from the same river (same colour) also tended to cluster near each other. C) A map of  
596 the various rivers sampled for this study and the corresponding private allele counts  
597 (plotted with the maps [70] package in R). The private allele counts are also displayed to  
598 the side as a bar graph.

599

600 **Figure 3. Fraction of the genome responsive to isolation-by-distance.** A) A Manhattan  
601 plot of the latitude genome-wide association analysis of all coho salmon except for the  
602 Chile strain. The red line represents a significance level of 0.01 after a Bonferroni  
603 correction and the blue line a 0.05 level with the same correction. B) A histogram of  
604 variant counts for different significance levels. C) The percent of the variants at different  
605 significance levels. The percentage represents all the variants at or above the line. There  
606 are 33.8% of the variants that have a significant association with latitude at  $p \leq 0.1$   
607 without multiple test correction.

608

609 **Figure 4. Genes with multiple ‘moderate’ nucleotide variants that may influence**  
610 **function.** Four genes were found to be associated with latitude and also contained  
611 multiple SNPs that likely modify gene function. The four genes are: rhotekin-like (RTKN  
612 LOC109895613), plectin-like (PLEC LOC109904478), PH and SEC7 domain-containing  
613 protein 4-like (PSD4 LOC109868337), and GTPase IMAP family member 9-like (Gimap9  
614 LOC109880231). A) Pie diagrams showing the distribution of reference (blue) and  
615 alternative alleles (red) for each gene and location. B) Map produced with the maps  
616 package in R showing the sampling sites.

617

618 **Figure 5. Demographic histories of coho salmon populations based on genome**  
619 **sequencing.** A) Each labeled line represents multiple individuals from the same river or

620 strain. The X-axis represents calendar years based on a generation time of 3 years for  
621 coho salmon. The Y-axis is the effective population size ( $N_e$ ) estimate. The estimated  
622 age of the Cordilleran ice sheet maximum was taken from [50]. The approximate age of  
623 the last interglacial period was based on [71]. B) For each location, a number nearby  
624 indicates a drop of at least 5,000 in the  $N_e$  for one of the time points noted in A. The  
625 colour of the river label indicates if the river had a drop in  $N_e$  during the 1<sup>st</sup> time interval  
626 (orange – yes, blue – no, the Klamath River was the only southern river with a drop  
627 during the 1<sup>st</sup> time period).

628

## 629 Tables

630 **Table 1.** Whole-genome resequencing sources

| Source                        | Country | State/Province | Count        |
|-------------------------------|---------|----------------|--------------|
|                               |         |                | Female, Male |
| Klamath River (Hatchery)      | US      | CA/OR          | 1F, 4M       |
| Deschutes River (Hatchery)    | US      | CA/OR          | 2F, 3M       |
| Big Quilcene River (Hatchery) | US      | WA             | 2F, 3M       |
| Wallace River (Hatchery)      | US      | WA             | 6M, 4?       |
| Tsoo-Yess River (Hatchery)    | US      | WA             | 1F, 4M       |
| Inch Creek (Hatchery)         | Canada  | BC             | 3F, 5M       |
| Capilano River (Hatchery)     | Canada  | BC             | 5F           |
| Robertson Creek (Hatchery)    | Canada  | BC             | 5M           |
| Salmon River (Hatchery)       | Canada  | BC             | 5F           |
| Pallant Creek                 | Canada  | BC             | 5M           |
| Kitimat River (Hatchery)      | Canada  | BC             | 5F, 5M       |
| Berners River                 | US      | AK             | 2F, 3M       |
| Kwethluk River                | US      | AK             | 1F, 4M       |
| AquaChile (Strain)            | Chile   | NA             | 5F           |

631 State/Province Abbreviations: CA - California, OR - Oregon, WA - Washington, BC -

632 British Columbia, AK – Alaska

633

634 **Table 2.** Genome statistics

|       | <b>Contig N50</b> | <b>Contig #</b> | <b>BUSCO</b>      | <b>% Repeats</b> | <b>Genes</b> |
|-------|-------------------|-----------------|-------------------|------------------|--------------|
| Ver 1 | 58,118            | 97,074          | 91%-55:37*        | 44.82†           | 41,179†      |
| Ver 2 | 1,159,298         | 8,770           | 99.2%-57.1:42.2*† | 53.12†           | 60,330†      |

635 Ver 1, NCBI: GCF\_002021735.1; Ver 2, NCBI: GCF\_002021735.2

636 \*Percent complete-single:duplicate

†Reported by NCBI (NCBI used actinopterygii\_odb10 for BUSCO)

637

638 **Table 3.** Distribution of common nucleotide variant annotations

|                   | <b>Entire genome*</b> | <b>Associated with latitude*</b> |
|-------------------|-----------------------|----------------------------------|
| <b>Intron</b>     | 44.0%                 | 42.1%                            |
| <b>Intergenic</b> | 31.2%                 | 31.2%                            |
| <b>Upstream</b>   | 10.4%                 | 11.2%                            |
| <b>Downstream</b> | 7.3%                  | 7.6%                             |
| <b>3' UTR</b>     | 2.8%                  | 3.2%                             |
| <b>Missense</b>   | 0.8%                  | 1.7%                             |
| <b>Synonymous</b> | 1.1%                  | 1.1%                             |

639 \*5,631,459 genomic SNPs, 3,940 significant SNPs from GWA analysis

640

641 **Supplemental Material**

642 **Figure S1. Runs of homozygosity and admixture among coho salmon from different**

643 **streams.** A) The top figure shows the total runs of homozygosity (ROH) for each

644 individual (default settings in PLINK). The bottom figures show the admixture of each

645 individual based on cluster counts of k=2 and k=3 (with Admixture software [72]) using

646 default settings with LD filtered SNPs). Streams are shown at the bottom and delineated  
647 by the alternating blue bar. B) A map (generated using the maps package in R) showing  
648 the locations in A.

649

650 **Figure S2. The relationship between runs of homozygosity and latitude.** A) Counts of  
651 runs of homozygosity (ROH) and the total length of the ROH when combined (see  
652 Methods for parameters used). There is a distinct cluster of Salmon River individuals  
653 with higher counts and lengths of ROH. B) The relationship between the average length  
654 of ROH per individual and latitude. The line was plotted using the `geom_smooth`  
655 function in `ggplot2` with the linear model method. Latitude significantly ( $p = 0.029$ )  
656 explained variation in the average length of ROH (~6% of the variation, Adjusted  $R^2 =$   
657 0.04886).

658

659 **File S1. Sample information and SRA accession numbers.**

660

661 **File S2. Nucleotide variants significantly associated with latitude.** The  
662 SignificantVariants tab in this spreadsheet file has information on all of the significantly  
663 associated SNPs with latitude. The ModerateGenes tab has information on SNPs that  
664 were both associated with latitude and also have annotations from SNPeff that were  
665 moderately likely to influence gene function. The Moderate+LowGenes tab has  
666 information on SNPs that were both associated with latitude and also have an  
667 annotation from SNPeff that were likely to have moderate or low influences on gene  
668 function. The GO tab has two lists of genes that were used in the GO enrichment  
669 analyses. The Frequency of MultiVariantGenes tab has information on the genes with  
670 multiple SNPs thought to moderately influence gene function and which were also  
671 associated with latitude. This information was used to generate pie charts. The  
672 GenotypeGenes tab has the genotypes for each individual for genes in the Frequency of  
673 MultiVariantGenes tab. The Regions tab has information on the latitudes used for each

674 stream. The DistributionOfVariantAnnotations tab has information on SNPeff  
675 annotations from the SNPs that were significantly associated with latitude as well as the  
676 SNPs from the entire genome.



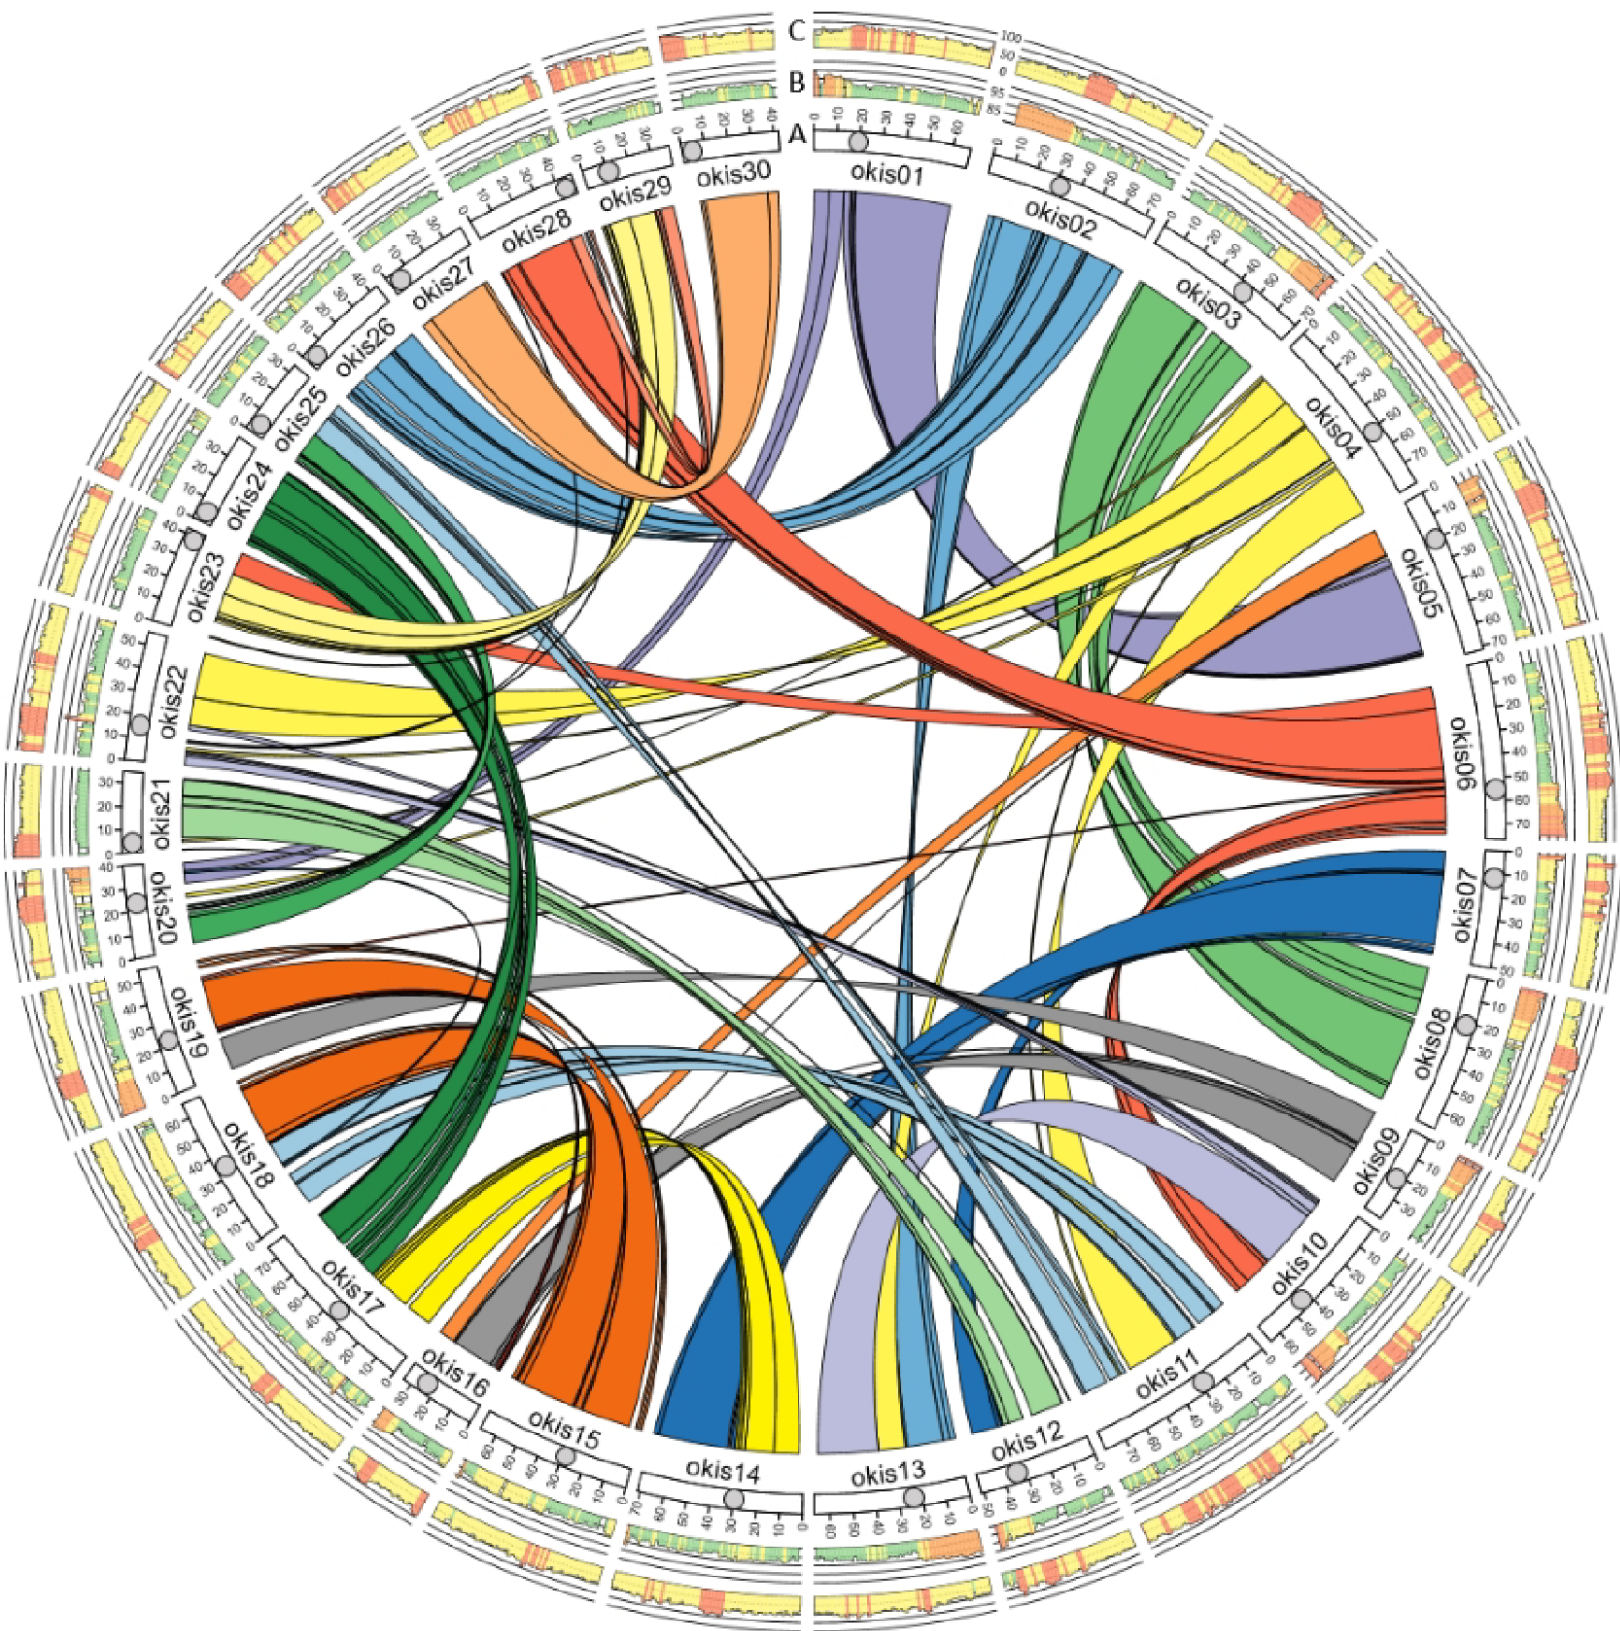

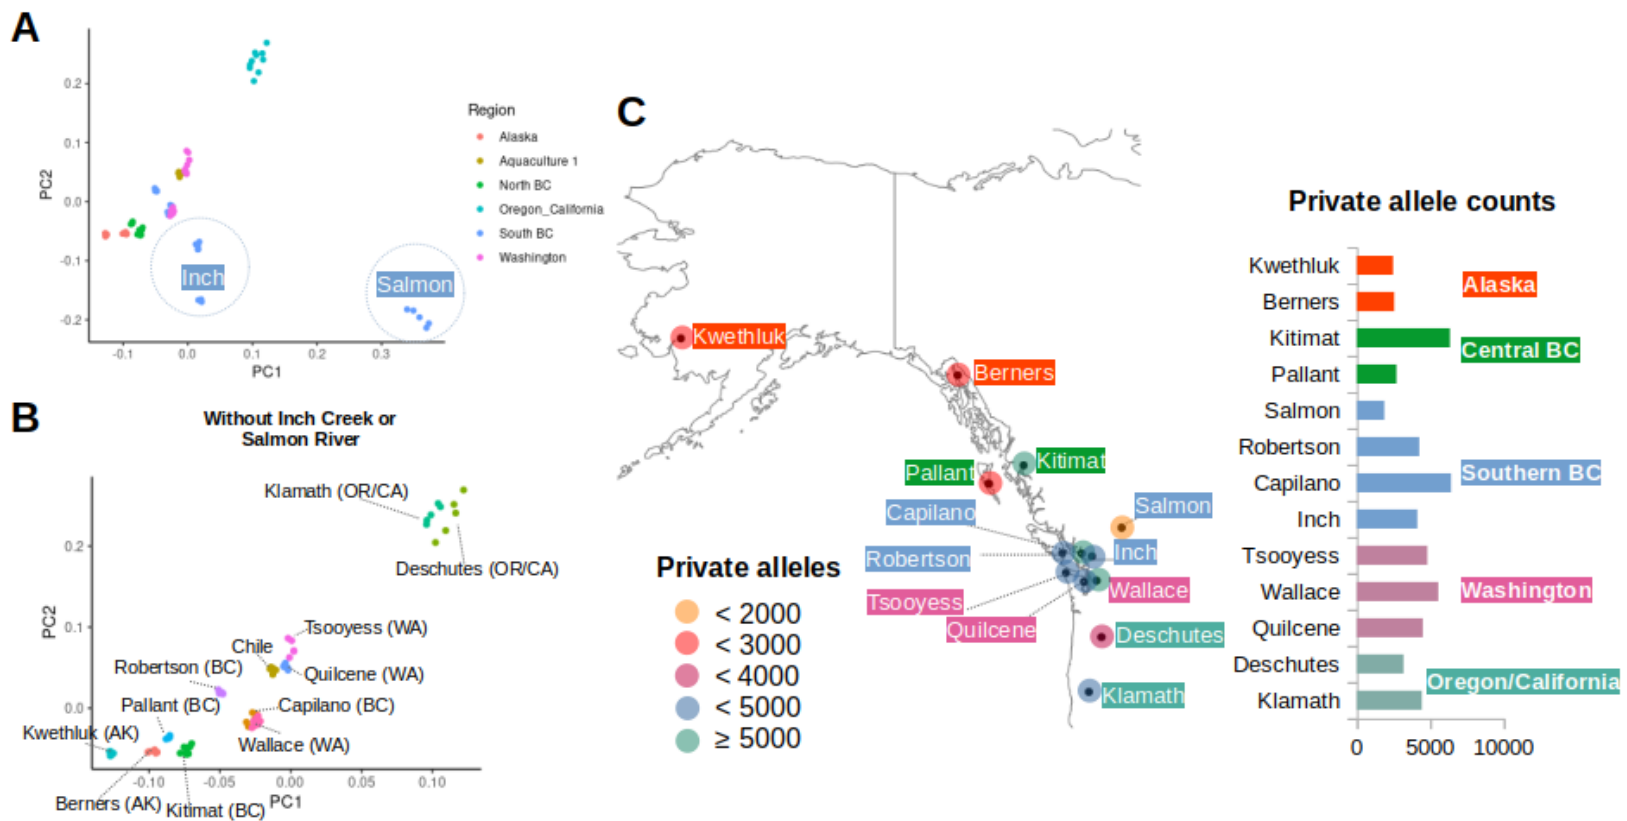

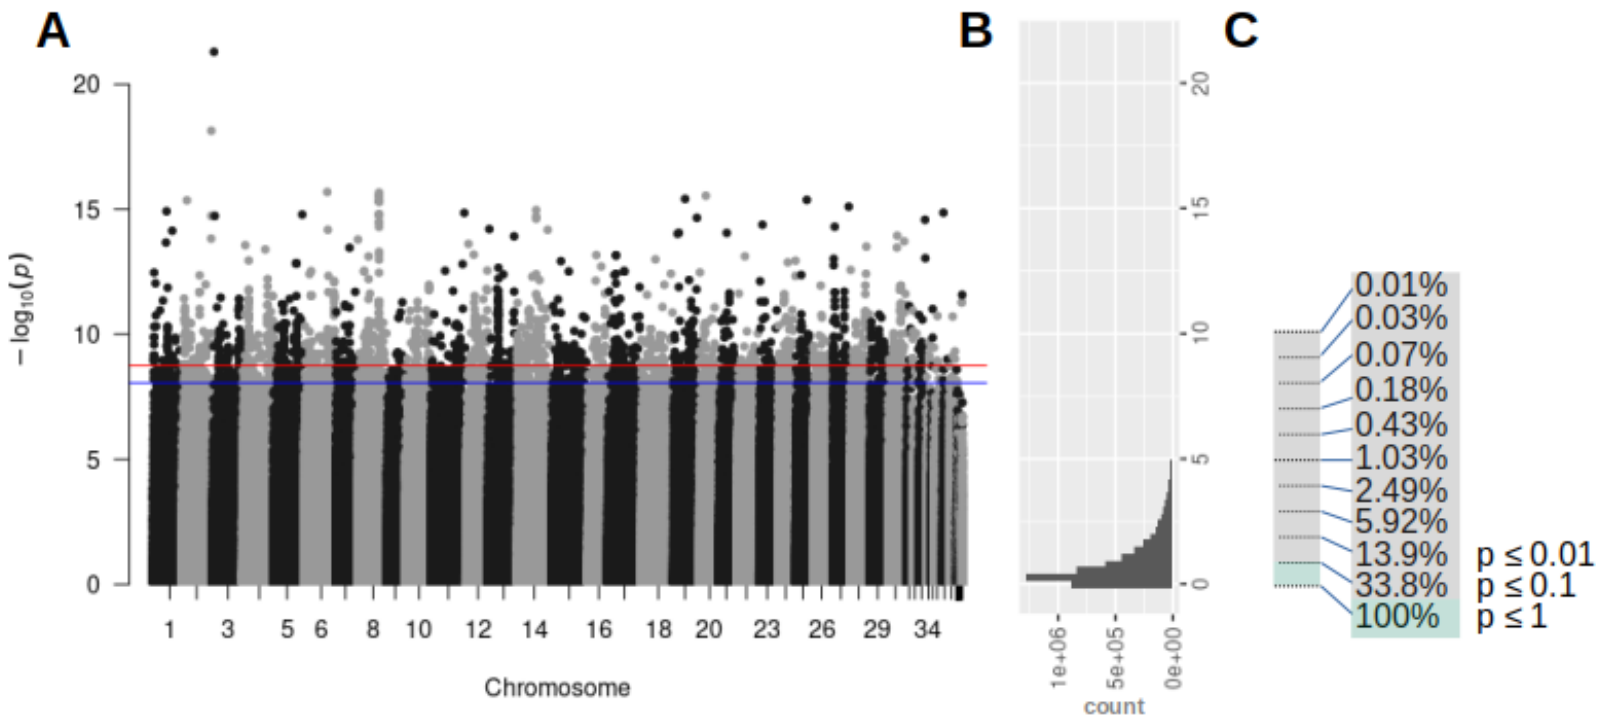

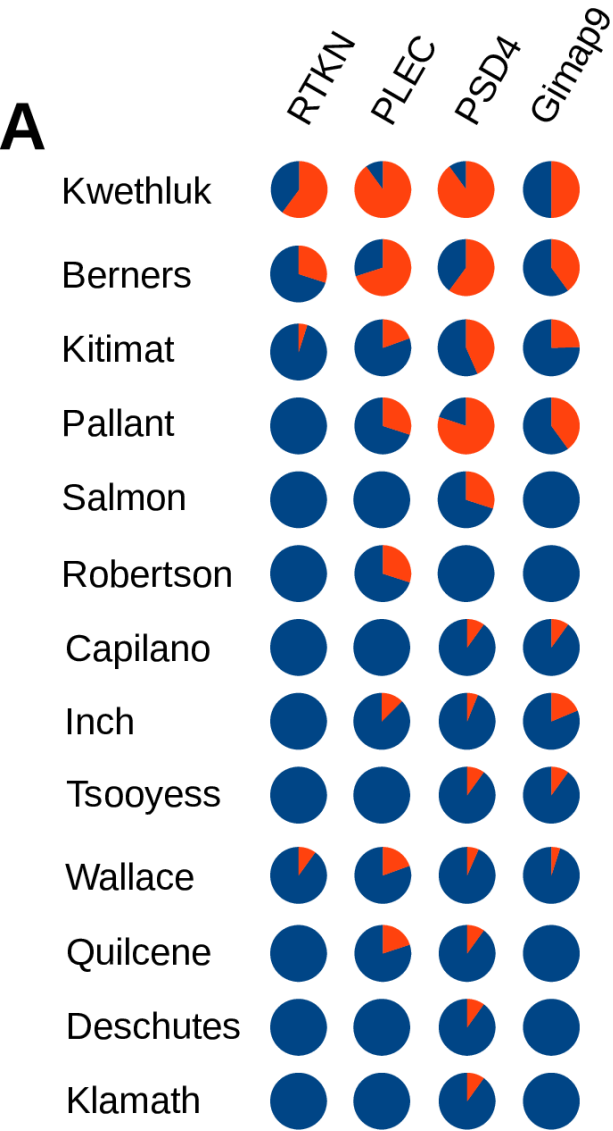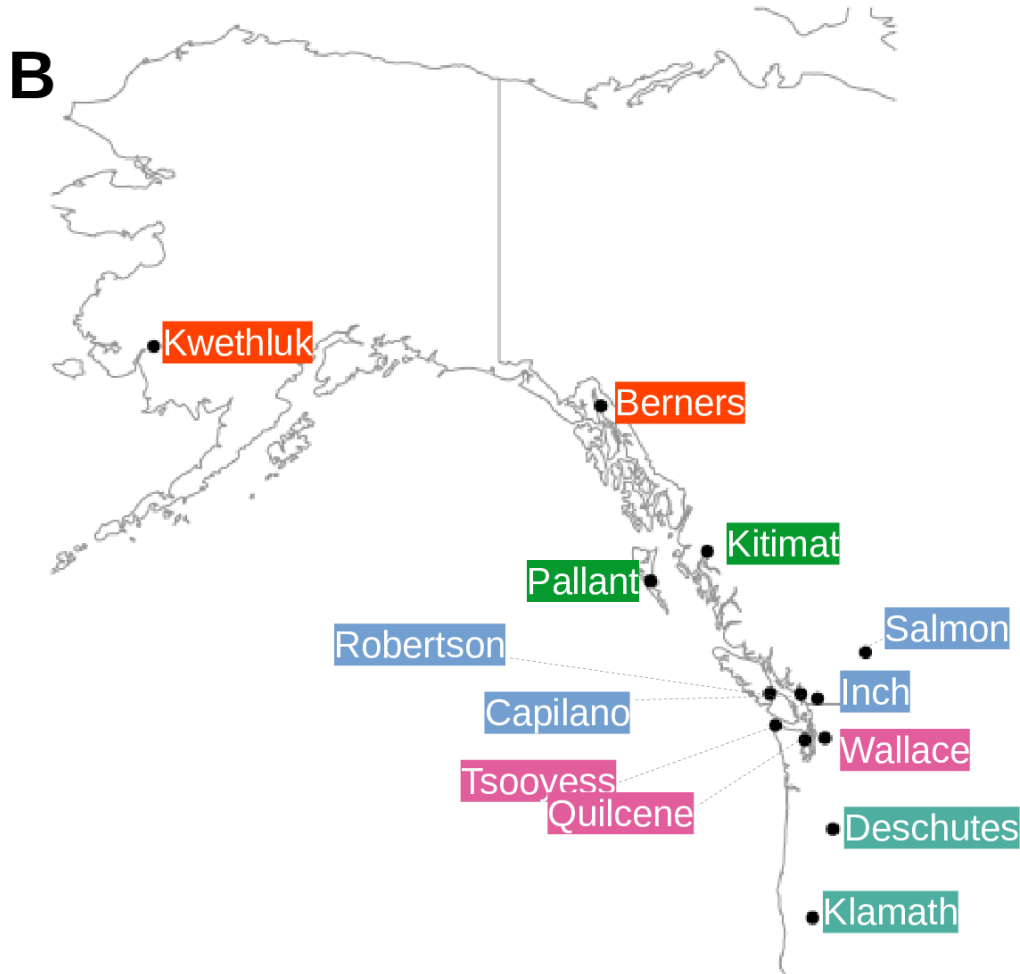

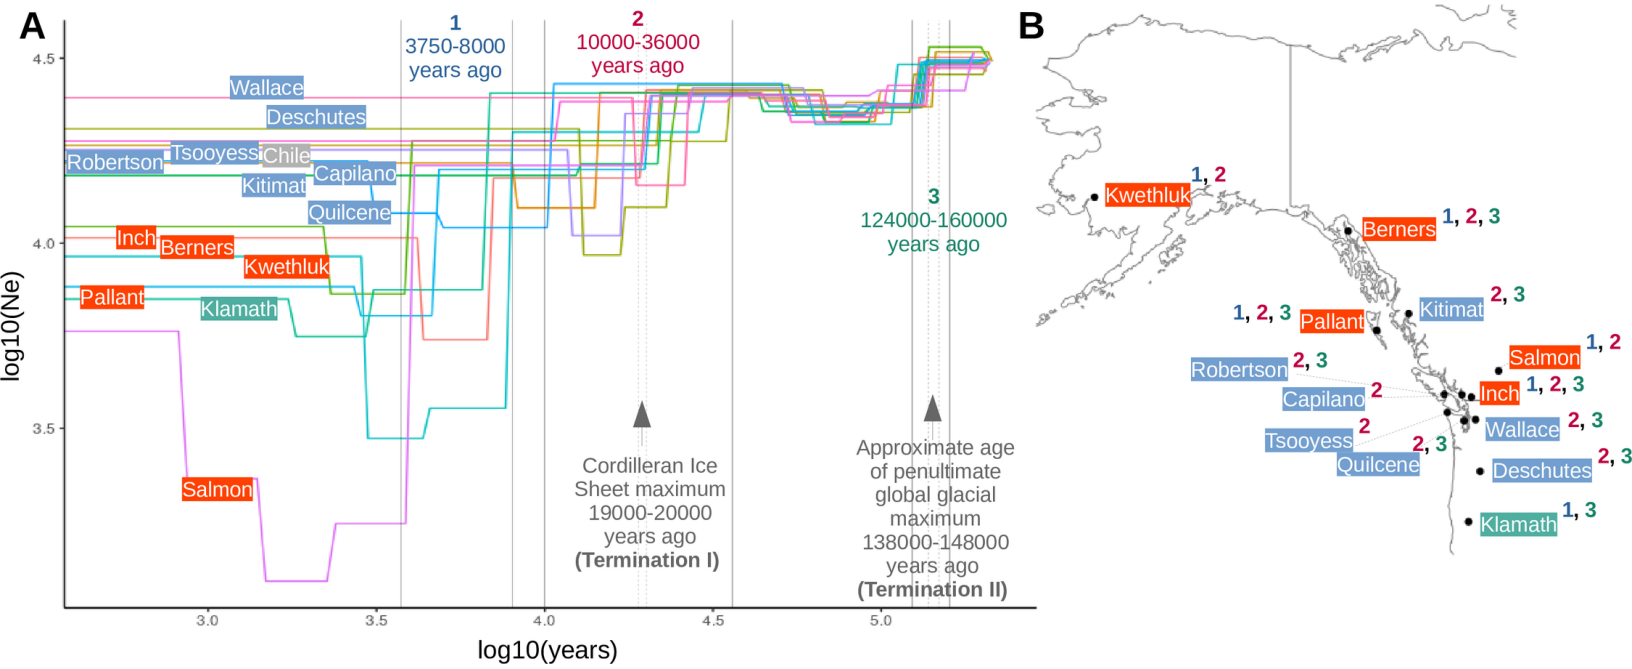

Source: https://www.biorxiv.org/content/10.1101/2022.06.14.496192.full.pdf
